# Supplementary material
Source: MDPI journal article supplement (https://www.mdpi.com/1999-4907/14/7/1389)

## Supplementary Materials

The south-facing slope had the highest total plant abundance of combined trees, shrubs and herbs, which was significant different from that on either the north-facing slope or the flat site; but separated by woody plants and herbs; the same difference was found only for the herbs, while the highest abundance of trees and shrubs on the north-facing slope being significantly different from the lowest on the south-facing slope (Table 2). There was significant difference of plant litter across the three sampled sites with the highest on the north-facing slope and the lowest on the flat site (Table S1).

**Table S1.** Attributes of plant community in the three sampled sites.

| Plant community attribute                           | North-facing slope | Flat site       | South-facing slope |
|-----------------------------------------------------|--------------------|-----------------|--------------------|
| Abundance of trees and shrubs                       | 213.07±10.24b      | 200.41±8.42ab   | 176.17±8.61a       |
| Abundance of herbs                                  | 1809.38±63.52a     | 1909.88±104.93a | 3283.72±137.91b    |
| Total plant abundance                               | 2022.45±65.96a     | 2110.28±104.08a | 3459.89±141.20b    |
| Total basal area (m <sup>2</sup> ha <sup>-1</sup> ) | 144.22±8.34a       | 174.30±6.42b    | 169.48±10.95ab     |
| Richness of trees and shrubs                        | 16.29±0.37b        | 16.14±0.32b     | 14.96±0.40a        |
| Richness of herbs                                   | 30.67±1.10a        | 36.20±1.90b     | 56.32±2.16c        |
| Total plant richness                                | 47.14±1.21a        | 51.84±1.90b     | 71.28±2.31c        |
| Litter standing crop (g)                            | 39.27±2.61c        | 27.94±0.83a     | 32.26±1.30b        |
| Total stand density of trees (ha <sup>-1</sup> )    | 102.45±26.11b      | 109.46±40.22b   | 86.21±26.93a       |

**Table S2**

Pearson's rank correlation coefficients (R) between soil microbial (bacterial and fungal) composition and the environmental variables.

| Aspect             |    | SOM             | PH             | SWC           | TP              | TN              | AP              | AN              | BC             | BR             | FC           |
|--------------------|----|-----------------|----------------|---------------|-----------------|-----------------|-----------------|-----------------|----------------|----------------|--------------|
| North-facing slope | BC | -0.01           | <b>0.51***</b> | -0.25         | <b>-0.46**</b>  | -0.1            | -0.23           | 0.07            |                |                |              |
|                    | BR | -0.25           | 0.16           | -0.09         | -0.14           | -0.11           | <b>-0.44**</b>  | 0.26            | 0.18           |                |              |
|                    | FC | 0.1             | 0.12           | 0.03          | -0.09           | 0.11            | -0.05           | 0.05            | 0.15           | <b>0.37*</b>   |              |
|                    | FR | -0.09           | 0.26           | 0.06          | -0.11           | 0.10            | -0.15           | 0.26            | 0.31           | <b>0.47**</b>  | <b>0.34*</b> |
| Flat site          | BC | <b>-0.51***</b> | <b>0.25*</b>   | <b>-0.24*</b> | <b>-0.35***</b> | <b>-0.57***</b> | <b>-0.62***</b> | <b>-0.40***</b> |                |                |              |
|                    | BR | -0.01           | -0.04          | <b>0.23*</b>  | -0.06           | -0.15           | -0.21           | 0.16            | -0.04          |                |              |
|                    | FC | <b>-0.23*</b>   | <b>0.30**</b>  | -0.13         | -0.19           | <b>-0.28*</b>   | <b>-0.24*</b>   | <b>-0.25*</b>   | <b>0.22*</b>   | 0.01           |              |
|                    | FR | 0.08            | -0.12          | <b>0.31**</b> | 0.08            | 0.05            | 0               | 0.21            | <b>-0.30**</b> | <b>0.48***</b> | -0.11        |
| South-facing slope | BC | <b>-0.40**</b>  | <b>0.58***</b> | -0.26         | -0.09           | -0.19           | <b>-0.52***</b> | -0.1            |                |                |              |
|                    | BR | -0.03           | 0.16           | 0.11          | 0.06            | 0.11            | <b>-0.38**</b>  | <b>0.32*</b>    | 0.2            |                |              |
|                    | FC | 0.05            | 0.26           | 0.09          | 0.27            | 0.19            | -0.09           | 0.19            | <b>0.31*</b>   | <b>0.41**</b>  |              |
|                    | FR | 0.05            | 0.18           | 0.09          | -0.19           | 0.23            | -0.25           | 0.23            | -0.05          | <b>0.52***</b> | 0.06         |

Soil organic material (SOM), soil moisture content (SMC), total phosphorus (TP), total nitrogen (TN), available phosphorus(AP), available nitrogen(AT), bacteria community(BC),bacteria richness(BR),fungal community(FC),fungal richness(FR). \*\*\*. Correlation is significant at the 0.001 level \*\*. Correlation is significant at the 0.01 level \*.Correlation is significant at the 0.05 level

**Table S3.**

**Pearson's rank correlation coefficients (R) between plant community attributes and the environmental variables.**

| Aspect             |     | SOM            | PH            | SWC             | TP             | TN             | AP             | AN             |
|--------------------|-----|----------------|---------------|-----------------|----------------|----------------|----------------|----------------|
| North-facing Slope | TPR | -0.18          | <b>0.14*</b>  | -0.05           | -0.23          | -0.04          | -0.10          | 0.12           |
|                    | TPB | <b>0.32*</b>   | 0.16          | 0.24            | 0.21           | <b>0.45**</b>  | 0.14           | 0.12           |
| Flat               | TPR | -0.01          | -0.03         | -0.04           | 0.19           | 0.03           | 0.01           | -0.01          |
|                    | TPB | <b>0.49***</b> | <b>-0.25*</b> | <b>0.23*</b>    | <b>0.48***</b> | <b>0.47***</b> | <b>0.44***</b> | <b>0.39***</b> |
| South-facing Slope | TPR | 0.25           | <b>-0.44*</b> | 0.34            | -0.35          | 0.04           | 0.25           | 0.11           |
|                    | TPB | -0.09          | <b>0.43**</b> | <b>-0.53***</b> | 0.22           | -0.03          | -0.16          | 0.02           |

Total Plant Biomass (TPB), Total Plant Richness (TPR). \*\*. Correlation is significant at the 0.01 level ;\*.Correlation is significant at the 0.05 level

**Figure S1.**

Relative abundances (average values and standard error) of soil bacteria (A) and soil fungi (B) at phylum level in the three sampled sites (north-facing slope, flat site and south-facing slope). Different letters indicate significant differences (ANOVA,  $P < 0.05$ , Tukey's HSD post-hoc analysis) among the three site groups.

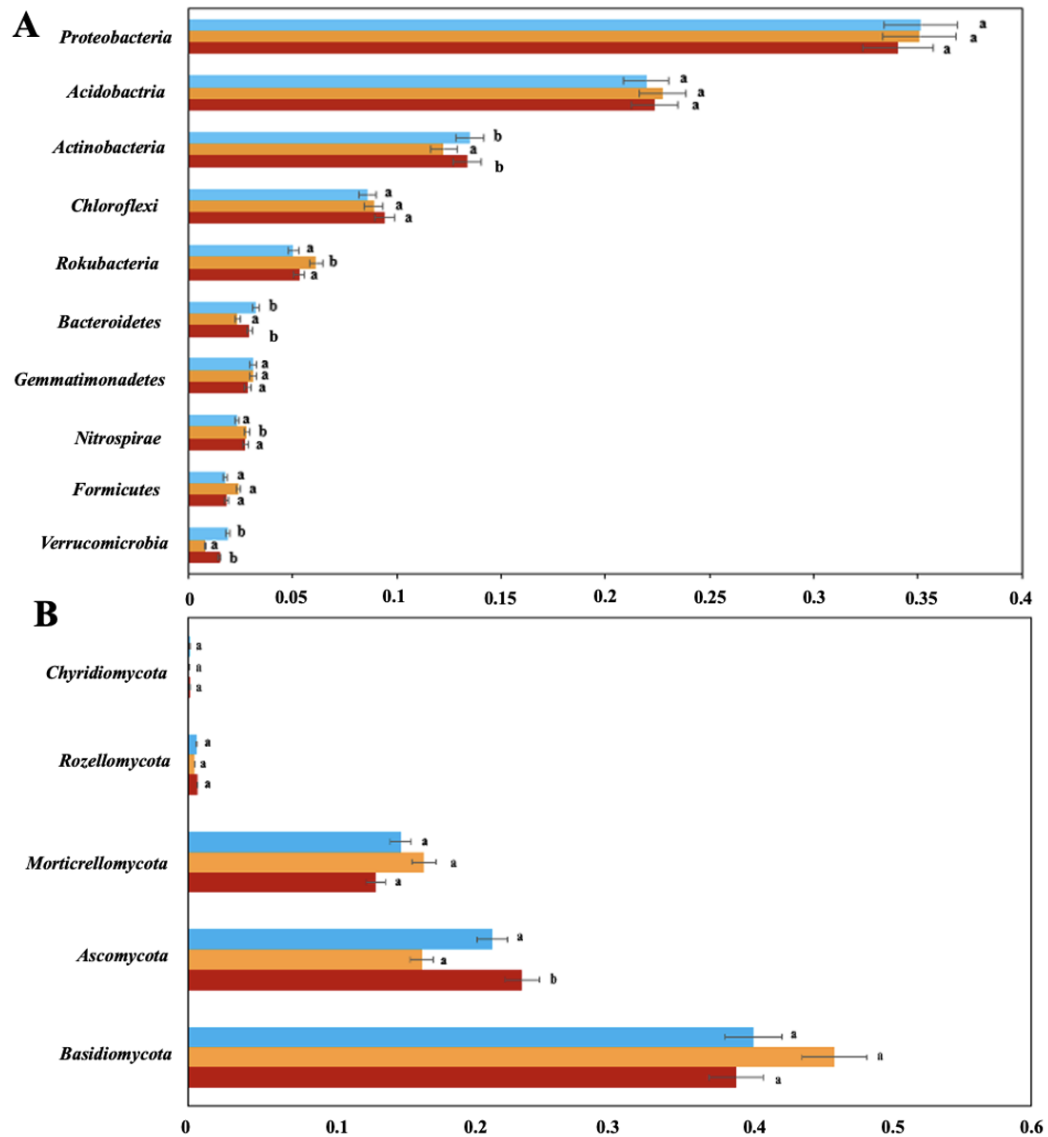

Supplement: s1 [file s1]
